# Supplementary material for: Ethylene-mediated improvement in sucrose accumulation in ripening sugarcane involves increased sink strength
Source: PubMed Central journal article supplement (PMC6599285; doi:10.1186/s12870-019-1882-z), 2019-06-28
Supplement: 12870_2019_1882_MOESM11_ESM.pdf [file 12870_2019_1882_MOESM11_ESM.pdf]

**Supplementary Table 1. Key statics of sugarcane developing stem tissue-derived RNA-seq data used in the study**

| Sample   | Raw Reads | Clean reads | Clean bases | Error (%) | Q20 (%) | Q30 (%) | GC (%) |
|----------|-----------|-------------|-------------|-----------|---------|---------|--------|
| MS_T1_1  | 31163840  | 30100751    | 3.76G       | 0.03      | 96.3    | 92.31   | 53.55  |
| MS_T1_2  | 31163840  | 30100751    | 3.76G       | 0.04      | 93.52   | 87.96   | 53.52  |
| MS_T2_1  | 42547794  | 40832307    | 5.1G        | 0.03      | 96.45   | 92.61   | 52.08  |
| MS_T2_2  | 42547794  | 40832307    | 5.1G        | 0.04      | 93.55   | 87.98   | 52.03  |
| MS_CK1_1 | 30125876  | 28789148    | 3.6G        | 0.03      | 96.53   | 92.76   | 54.04  |
| MS_CK1_2 | 30125876  | 28789148    | 3.6G        | 0.04      | 94.16   | 89.06   | 54.03  |
| MS_CK2_1 | 31541733  | 30095376    | 3.76G       | 0.03      | 96.6    | 92.9    | 54.12  |
| MS_CK2_2 | 31541733  | 30095376    | 3.76G       | 0.04      | 93.65   | 88.23   | 54.11  |
| LS_T1_1  | 35105070  | 33899692    | 4.24G       | 0.03      | 96.16   | 92.05   | 52.93  |
| LS_T1_2  | 35105070  | 33899692    | 4.24G       | 0.04      | 93.36   | 87.64   | 52.91  |
| LS_T2_1  | 29665898  | 28356704    | 3.54G       | 0.03      | 96.48   | 92.65   | 53.54  |
| LS_T2_2  | 29665898  | 28356704    | 3.54G       | 0.04      | 93.64   | 88.03   | 53.47  |
| LS_CK1_1 | 32532416  | 31345758    | 3.92G       | 0.03      | 96.24   | 92.21   | 53.08  |
| LS_CK1_2 | 32532416  | 31345758    | 3.92G       | 0.04      | 93.99   | 88.72   | 53.05  |
| LS_CK2_1 | 33588701  | 32446507    | 4.06G       | 0.03      | 96.14   | 92.01   | 53.67  |
| LS_CK2_2 | 33588701  | 32446507    | 4.06G       | 0.04      | 93.62   | 88.08   | 53.64  |
| HS_T1_1  | 33248563  | 31868529    | 3.98G       | 0.03      | 96.57   | 92.83   | 54.38  |
| HS_T1_2  | 33248563  | 31868529    | 3.98G       | 0.04      | 94.21   | 89.12   | 54.37  |
| HS_T2_1  | 30668558  | 29385779    | 3.67G       | 0.03      | 96.56   | 92.82   | 54.22  |
| HS_T2_2  | 30668558  | 29385779    | 3.67G       | 0.04      | 94.26   | 89.22   | 54.21  |
| HS_CK1_1 | 34669905  | 33328158    | 4.17G       | 0.03      | 96.6    | 92.91   | 53.74  |
| HS_CK1_2 | 34669905  | 33328158    | 4.17G       | 0.04      | 94.31   | 89.3    | 53.73  |
| HS_CK2_1 | 31892553  | 30695645    | 3.84G       | 0.03      | 96.6    | 92.85   | 55.12  |
| HS_CK2_2 | 31892553  | 30695645    | 3.84G       | 0.04      | 94.18   | 89.06   | 55.11  |

Sample: Sample name: 1 is for the left reads and 2 for the right reads. Clean reads stand for the left and right. T: ethehone treatment, CK: check (water); HS, MS and LS are high-sugar, medium-sugar and low-sugar sugarcane genotypes, respectively.
