# Supplementary material for: Ethylene-mediated improvement in sucrose accumulation in ripening sugarcane involves increased sink strength
Source: PubMed Central journal article supplement (PMC6599285; doi:10.1186/s12870-019-1882-z), 2019-06-28
Supplement: 12870_2019_1882_MOESM12_ESM.pdf [file 12870_2019_1882_MOESM12_ESM.pdf]

**Supplementary Table 2. Frequency of transcripts and unigenes of different length identified from RNA-seq data**

| <b>Transcript length interval</b> | <b>200-500 bp</b> | <b>500-1k bp</b> | <b>1-2k bp</b> | <b>&gt;2k bp</b> | <b>Total</b> |
|-----------------------------------|-------------------|------------------|----------------|------------------|--------------|
| Number of transcripts             | 148407            | 84387            | 66816          | 37846            | 337456       |
| Number of UniGenes                | 96189             | 33893            | 20641          | 12331            | 163054       |
