# Supplementary material for: Ethylene-mediated improvement in sucrose accumulation in ripening sugarcane involves increased sink strength
Source: PubMed Central journal article supplement (PMC6599285; doi:10.1186/s12870-019-1882-z), 2019-06-28
Supplement: 12870_2019_1882_MOESM14_ESM.pdf [file 12870_2019_1882_MOESM14_ESM.pdf]

**Supplementary Table 4. Annotation statistics of the unigenes assembled from RNA-seq data**

|                                    | <b>Number of nigenes</b> | <b>Percentage (%)</b> |
|------------------------------------|--------------------------|-----------------------|
| Annotated in NR                    | 67147                    | 41.18                 |
| Annotated in NT                    | 59657                    | 36.58                 |
| Annotated in KO                    | 17330                    | 10.62                 |
| Annotated in SwissProt             | 37873                    | 23.22                 |
| Annotated in PFAM                  | 44386                    | 27.22                 |
| Annotated in GO                    | 51907                    | 31.83                 |
| Annotated in KOG                   | 19194                    | 11.77                 |
| Annotated in all Databases         | 8385                     | 5.14                  |
| Annotated in at least one Database | 86944                    | 53.32                 |
| Total Unigenes                     | 163054                   | 100                   |
