# Supplementary material for: Ethylene-mediated improvement in sucrose accumulation in ripening sugarcane involves increased sink strength
Source: PubMed Central journal article supplement (PMC6599285; doi:10.1186/s12870-019-1882-z), 2019-06-28
Supplement: 12870_2019_1882_MOESM15_ESM.pdf [file 12870_2019_1882_MOESM15_ESM.pdf]

**Supplementary Table5. Primers used for Real time PCR**

| <b>Genes</b> | <b>Primers</b> | <b>Sequences</b>         |
|--------------|----------------|--------------------------|
| c81582_g1    | Forward        | CATGGGTGGCAGAGAAGC       |
|              | Reverse        | CAAGGTGAACTTCCCCGAC      |
| c91663_g1    | Forward        | GTTTTAGCTTAACCCTGCTGTC   |
|              | Reverse        | GATTGGAGAGGGAAGAGAAGC    |
| c93409_g3    | Forward        | GTCTGAAATTGCTCACGGTG     |
|              | Reverse        | GAATTACACCTGGTCTGGTCAG   |
| c93760_g1    | Forward        | GAAATGGTCGTGGTCTAGGG     |
|              | Reverse        | GCTTCCTCGCCTACCACC       |
| c77130_g1    | Forward        | CTTCAAACGACTCAAGTCCCT    |
|              | Reverse        | CACGACTCCTCTGCCCCCTC     |
| c84505_g3    | Forward        | GAGATCCTTGCCAAACTAACTG   |
|              | Reverse        | GCAAAACCACTTGTTGTATTGAC  |
| c78352_g3    | Forward        | CATCCCGTCCATGAATCC       |
|              | Reverse        | CGTATAATGCCACATCTGTGC    |
| c87273_g1    | Forward        | GGGATCACCACGTAGTTCACC    |
|              | Reverse        | CCTCAAGGTGCAGAACAGCC     |
| c93121_g3    | Forward        | CCTTTCCTTGGTGAAGTATGGC   |
|              | Reverse        | CAAAAGTGGACTGACCAAAGACC  |
| c95560_g1    | Forward        | GAGCAGCATCAGTGTGGAAG     |
|              | Reverse        | GATATGACATGCTTGGTCGGAC   |
| c101031_g1   | Forward        | AAGAAGAAGAAAGGAAGATGGTTG |
|              | Reverse        | AGGTAGAGTGGAAGGTATTGTTGG |
| c71803_g1    | Forward        | GCTTCCTTGCCTTGTGAATG     |
|              | Reverse        | TTTAATTTGGTGCATCTGTATCG  |
| c101169_g3   | Forward        | CATCCTCGCCACGGACTAC      |
|              | Reverse        | GGGAATGACGGTGAACAGC      |
| c83266_g1    | Forward        | ATCTTTGTTGGCCTTCTTCC     |
|              | Reverse        | CTTGGCTGGCACTGTAATGTTT   |
| c83361_g1    | Forward        | AAACATTGAAATACGCTACGGG   |
|              | Reverse        | GCTGTGTGAACTCTGGTCTGAAC  |
| c95985_g1    | Forward        | TTCTGGCGAGTGATAATGACC    |
|              | Reverse        | TTTAACCCGCTGCCGATTC      |
| c97708_g1    | Forward        | TTCATATTAATAGGCACCAAACG  |
|              | Reverse        | CCATCTCATGTGACCTGTAGGC   |
| c42182_g1    | Forward        | TTGGTGAAGATGTTAGTGAATG   |
|              | Reverse        | GAGAAGTTCAATCCATTTGTCAG  |
